# Supplementary material for: First principle studies on the atmospheric oxidation of HFC-C1436 initiated by the OH radical
Source: Royal Society of Chemistry journal article supplement (doi:10.1039/c9nj04908h), 2020-01-01
Supplement: c9nj04908h1.pdf [file c9nj04908h1.pdf]

## First Principle Quantum Chemical Studies on the Atmospheric Oxidation of HFC-C1436 with OH radical

R. Bhuvaneshwari <sup>a, b</sup> and K. Senthilkumar<sup>\*, b</sup>

<sup>a</sup> Department of Physics, Vellalar College For Women, Erode, India-638 012.

<sup>b</sup> Department of Physics, Bharathiar University, Coimbatore, India-641 046.

\*Corresponding author: Fax No: +91-422-2422387, E-Mail: [ksenthil@buc.edu.in](mailto:ksenthil@buc.edu.in)

### Supporting Information

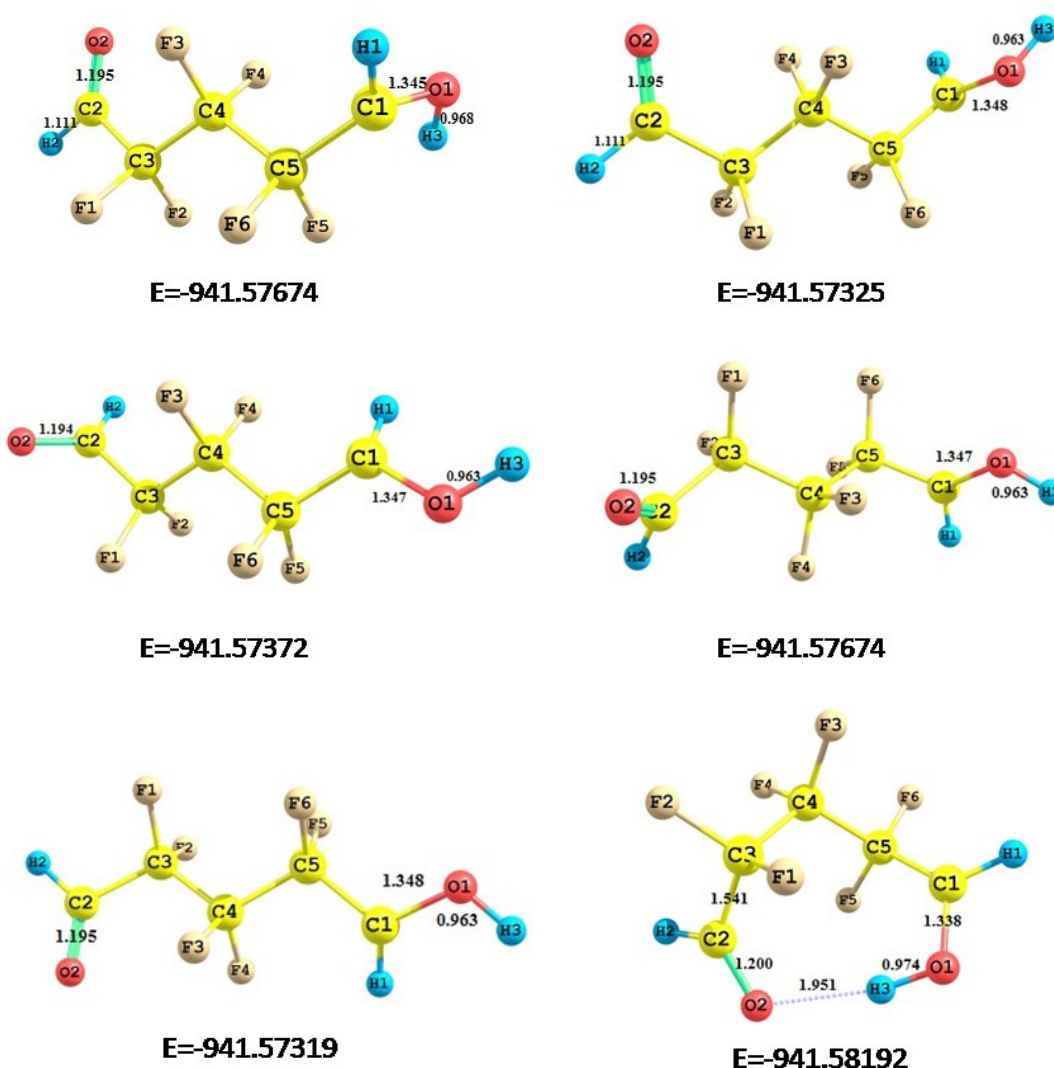

Fig S1: Optimized geometry of the conformers of I6 with the energy values

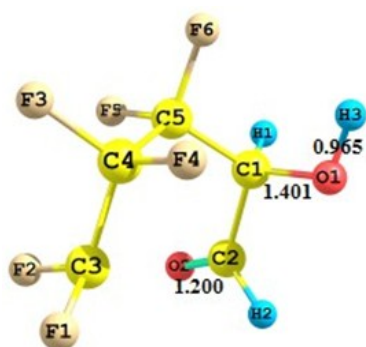

**E=-941.56945**

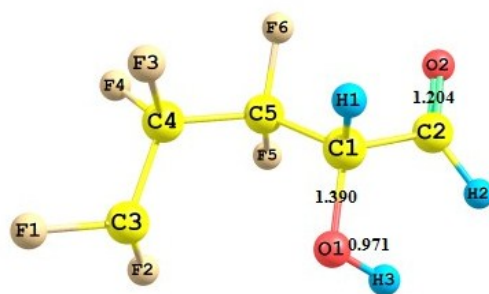

**E=-941.5635**

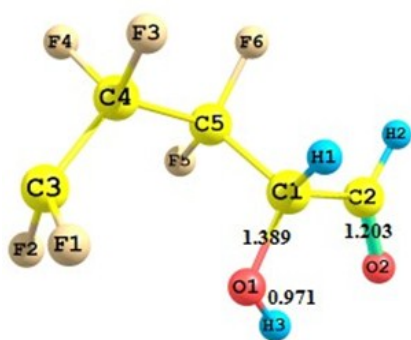

**E=-941.57643**

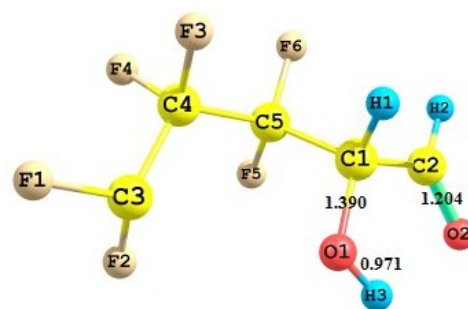

**E=-941.57739**

Fig S2: Optimized geometry of the conformers of I20 with the energy values

**Table S1:** Relative energies  $\Delta E_{\text{Tot}}$  (kcal/mol), enthalpy  $\Delta H_{298}$  (kcal/mol) and Gibbs free energy  $\Delta G_{298}$  (kcal/mol) for the Unimolecular decomposition pathway-A of alkoxy radical, I4 calculated at M06-2X,  $\omega$ B97XD and CCSD(T) levels of theory.

| Stationary points         | M06-2X/ aug-cc-pvDZ     |                  |                  | $\omega$ B97XD/ aug-cc-pvDZ |                  |                  | CCSD(T)/aug-cc-pvDZ//<br>M06-2X/ aug-cc-pvDZ |
|---------------------------|-------------------------|------------------|------------------|-----------------------------|------------------|------------------|----------------------------------------------|
|                           | $\Delta E_{\text{Tot}}$ | $\Delta H_{298}$ | $\Delta G_{298}$ | $\Delta E_{\text{Tot}}$     | $\Delta H_{298}$ | $\Delta G_{298}$ | $\Delta E_{\text{Tot}}$                      |
| <b>I5</b>                 | 0                       | 0                | 0                | 0                           | 0                | 0                | 0                                            |
| <b>TS7</b>                | 7.66                    | 6.46             | 5.28             | 6.9                         | 5.77             | 5.42             | 6.77                                         |
| <b>I6</b>                 | -0.25                   | -2.2             | 0.55             | -1.13                       | -2.88            | -2.82            | -1.04                                        |
| <b>I6+O<sub>2</sub></b>   | 0                       | 0                | 0                | 0                           | 0                | 0                | 0                                            |
| <b>TS8</b>                | 5.66                    | 4.71             | 6.22             | 5.14                        | 4.83             | 4.97             | 5.85                                         |
| <b>P4+HO<sub>2</sub></b>  | -13.24                  | -12.42           | -8.47            | -15.85                      | -14.72           | -11.34           | -13.57                                       |
| <b>P4+OH</b>              | 0                       | 0                | 0                | 0                           | 0                | 0                | 0                                            |
| <b>TS9</b>                | 4.64                    | 2.38             | 2.66             | 0.88                        | 0.19             | 0.26             | -5.29                                        |
| <b>I7+H<sub>2</sub>O</b>  | -25.29                  | -24.66           | -24.00           | -25.04                      | -24.35           | -24.69           | -24.26                                       |
| <b>I7+O<sub>2</sub></b>   | 0                       | 0                | 0                | 0                           | 0                | 0                | 0                                            |
| <b>I8</b>                 | -31.5                   | -28.87           | -24.70           | -29.30                      | -26.54           | -23.27           | -29.88                                       |
| <b>I8+NO</b>              | 0                       | 0                | 0                | 0                           | 0                | 0                | 0                                            |
| <b>I9+NO<sub>2</sub></b>  | -14.23                  | -14.02           | -12.11           | -13.58                      | -13.17           | -12.44           | -14.46                                       |
| <b>I9</b>                 | 0                       | 0                | 0                | 0                           | 0                | 0                | 0                                            |
| <b>TS10</b>               | 1.51                    | 0.38             | 0.84             | 2.89                        | 2.2              | 2.09             | 0.96                                         |
| <b>I10+CO<sub>2</sub></b> | -26.79                  | -27.30           | -30.72           | -25.35                      | -25.6            | -30.53           | -27.55                                       |
| <b>I10+O<sub>2</sub></b>  | 0                       | 0                | 0                | 0                           | 0                | 0                | 0                                            |
| <b>I11</b>                | -30.97                  | -30.14           | -27.23           | -31.21                      | -30.79           | -28.85           | -31.66                                       |
| <b>I11+NO</b>             | 0                       | 0                | 0                | 0                           | 0                | 0                | 0                                            |
| <b>I12+NO<sub>2</sub></b> | -13.37                  | -13.24           | -12.08           | -12.57                      | -12.11           | -11.58           | -13.32                                       |
| <b>I12</b>                | 0                       | 0                | 0                | 0                           | 0                | 0                | 0                                            |
| <b>TS11</b>               | 6.78                    | 5.65             | 5.45             | 5.15                        | 4.08             | 3.75             | 4.9                                          |

|                            |        |        |        |        |        |        |        |
|----------------------------|--------|--------|--------|--------|--------|--------|--------|
| <b>I13+COF<sub>2</sub></b> | -7.59  | -8.35  | -4.22  | -9.54  | -10.35 | -6.51  | -9.28  |
| <b>I13+O<sub>2</sub></b>   | 0      | 0      | 0      | 0      | 0      | 0      | 0      |
| <b>I14</b>                 | -37.84 | -35.39 | -30.35 | -33.63 | -30.81 | -26.81 | -35.75 |
| <b>I14+NO</b>              | 0      | 0      | 0      | 0      | 0      | 0      | 0      |
| <b>I15+NO<sub>2</sub></b>  | -11.61 | -11.92 | -11.17 | -17.07 | -16.5  | -14.5  | -13.06 |
| <b>I15</b>                 | 0      | 0      | 0      | 0      | 0      | 0      | 0      |
| <b>TS12</b>                | 3.39   | 2.26   | 2.29   | 2.32   | 1.38   | 1.14   | 1.12   |
| <b>I16+COF<sub>2</sub></b> | -20.08 | -20.14 | -18.85 | -21.34 | -21.46 | -20.95 | -21.78 |
| <b>I16+O<sub>2</sub></b>   | 0      | 0      | 0      | 0      | 0      | 0      | 0      |
| <b>I17</b>                 | -24.41 | -22.59 | -19.71 | -21.39 | -19.18 | -19.04 | -24.77 |
| <b>I17+NO</b>              | 0      | 0      | 0      | 0      | 0      | 0      | 0      |
| <b>I18+NO<sub>2</sub></b>  | -19.14 | -20.14 | -20.10 | -22.61 | -22.92 | -21.87 | -18.69 |
| <b>I18</b>                 | 0      | 0      | 0      | 0      | 0      | 0      | 0      |
| <b>TS13</b>                | 2.54   | 1.33   | 2.11   | 1.88   | -0.06  | -0.26  | 2.31   |
| <b>I19+COF<sub>2</sub></b> | -7.4   | -8.53  | -5.40  | -5.77  | -7.78  | -11.56 | -6.57  |
| <b>I19+O<sub>2</sub></b>   | 0      | 0      | 0      | 0      | 0      | 0      | 0      |
| <b>TS14</b>                | 3.51   | 2.38   | 4.47   | 2.13   | 1.51   | 4.62   | 3.10   |
| <b>CO+HO<sub>2</sub></b>   | -35.89 | -33.98 | -33.62 | -32.38 | -30.18 | -29.39 | -35.21 |

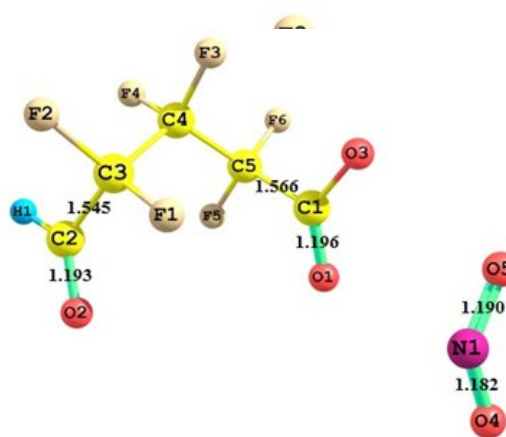

**I9+NO<sub>2</sub>**

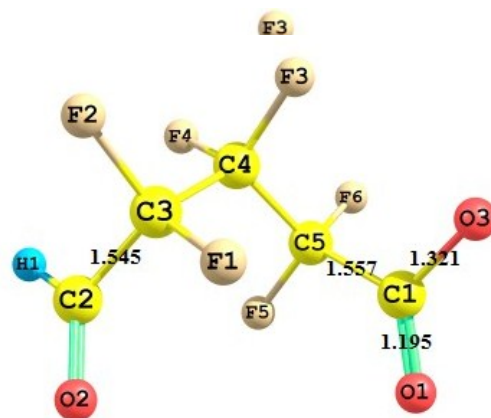

**I9**

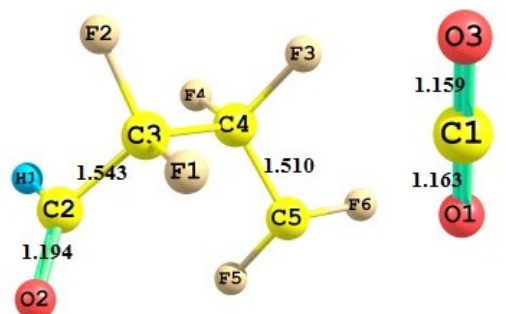

**I10+CO<sub>2</sub>**

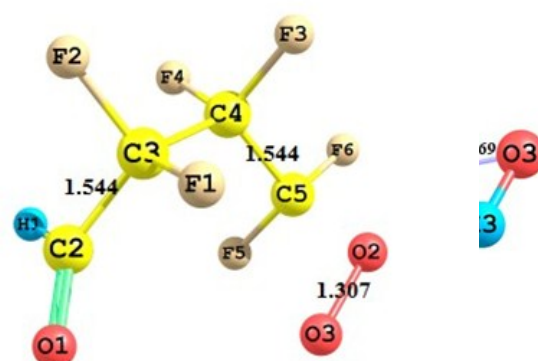

**I10+O<sub>2</sub>**

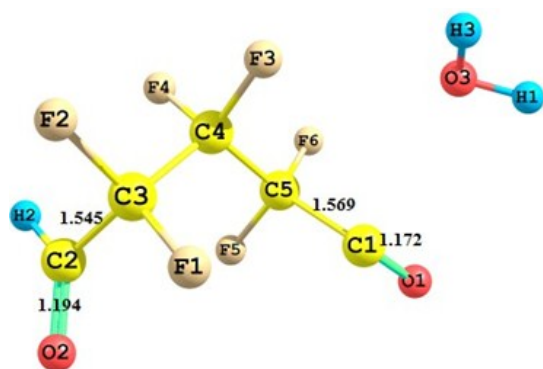

**I7+H<sub>2</sub>O**

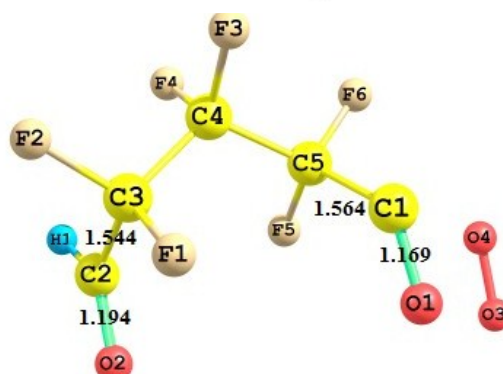

**I7+O<sub>2</sub>**

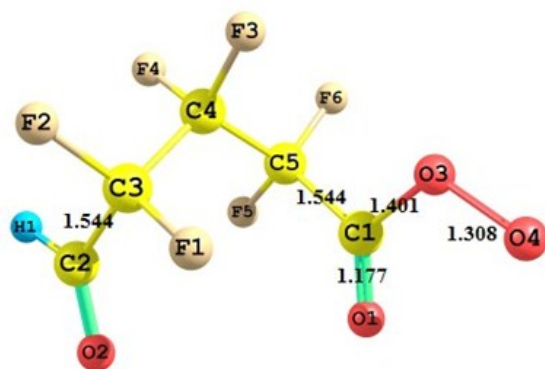

**I8**

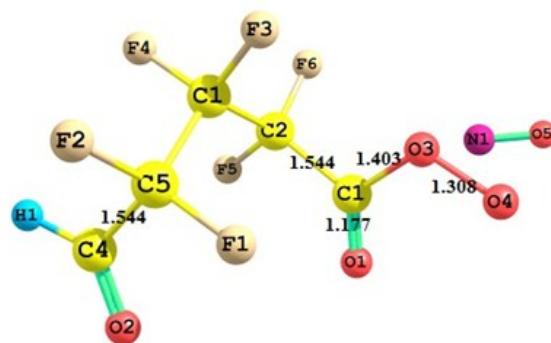

**I8+NO**

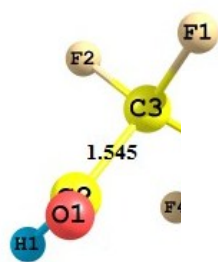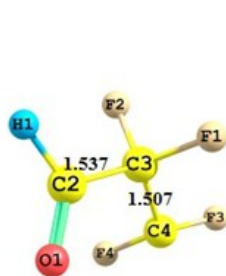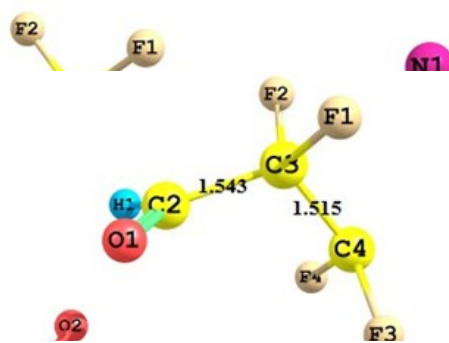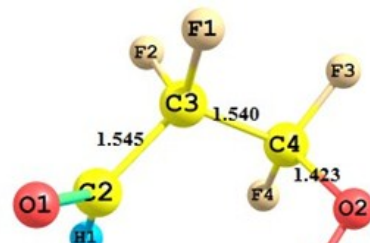

**I13+COI**

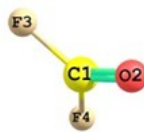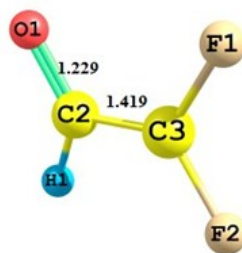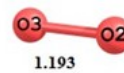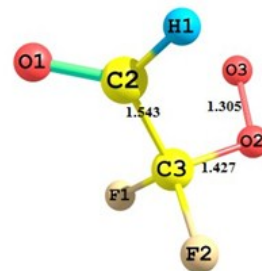

**I16+O<sub>2</sub>**

**I17**

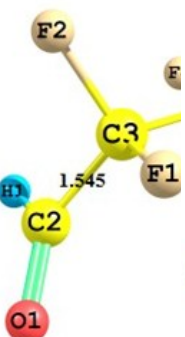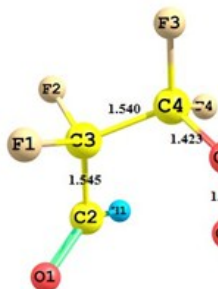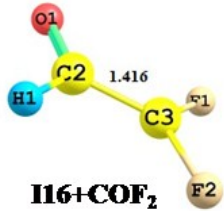

**I16+COF<sub>2</sub>**

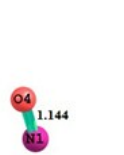

**I17+NO**

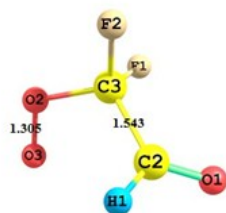

**I18+NO<sub>2</sub>**

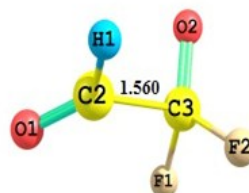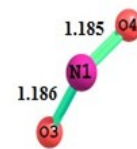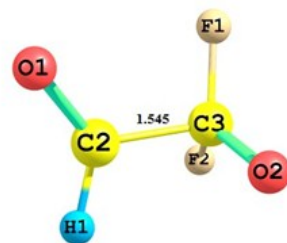

**I18**

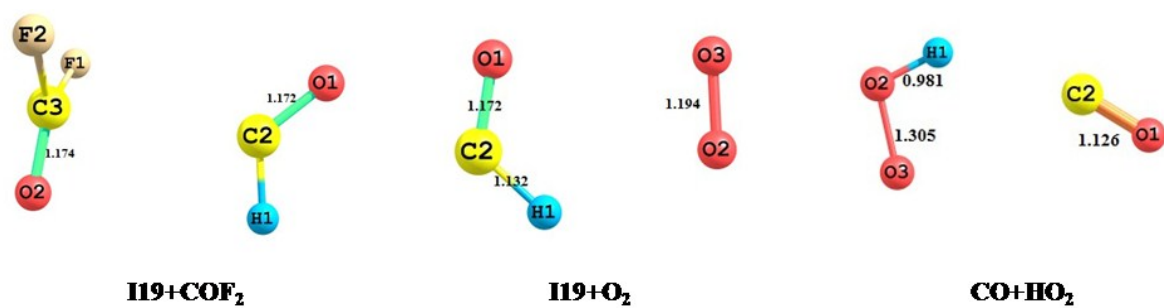

**Fig. S3:** Optimized structure of the intermediates and products involved in the first decomposition pathway of I4.

**Table S2:** Relative energies  $\Delta E_{\text{Tot}}$  (kcal/mol), enthalpy  $\Delta H_{298}$  (kcal/mol) and Gibbs free energy  $\Delta G_{298}$  (kcal/mol) for the Unimolecular decomposition pathway-B of alkoxy radical, I4 calculated at M06-2X,  $\omega$ B97XD and CCSD(T) levels of theory.



| Stationary points          | M06-2X/ aug-cc-pvDZ     |                  |                  | $\omega$ B97XD/ aug-cc-pvDZ |                  |                  | CCSD(T)/aug-cc-pvDZ//<br>M06-2X/ aug-cc-pvDZ |
|----------------------------|-------------------------|------------------|------------------|-----------------------------|------------------|------------------|----------------------------------------------|
|                            | $\Delta E_{\text{Tot}}$ | $\Delta H_{298}$ | $\Delta G_{298}$ | $\Delta E_{\text{Tot}}$     | $\Delta H_{298}$ | $\Delta G_{298}$ | $\Delta E_{\text{Tot}}$                      |
| <b>I5</b>                  | 0                       | 0                | 0                | 0                           | 0                | 0                | 0                                            |
| <b>TS15</b>                | 9.13                    | 9.95             | 8.03             | 10.44                       | 10.37            | 9.78             | 9.15                                         |
| <b>I20</b>                 | -2.64                   | -3.14            | -2.11            | -3.45                       | -2.51            | -1.11            | -2.36                                        |
| <b>I20+O<sub>2</sub></b>   | 0                       | 0                | 0                | 0                           | 0                | 0                | 0                                            |
| <b>I21</b>                 | -35.45                  | -33.32           | -29.94           | -33.61                      | -33.26           | -31.57           | -30.74                                       |
| <b>I21+NO</b>              | 0                       | 0                | 0                | 0                           | 0                | 0                | 0                                            |
| <b>I22+NO<sub>2</sub></b>  | -11.92                  | -11.8            | -11.48           | -14.95                      | -15.07           | -15.60           | -13.34                                       |
| <b>I22</b>                 | 0                       | 0                | 0                | 0                           | 0                | 0                | 0                                            |
| <b>TS16</b>                | 5.21                    | 4.14             | 3.77             | 5.13                        | 4.88             | 4.62             | 3.88                                         |
| <b>I23+COF<sub>2</sub></b> | -6.28                   | -6.90            | -9.27            | -9.29                       | -9.91            | -11.56           | -8.27                                        |
| <b>I23+O<sub>2</sub></b>   | 0                       | 0                | 0                | 0                           | 0                | 0                | 0                                            |
| <b>I24</b>                 | -36.52                  | -34.39           | -30.70           | -33.26                      | -30.94           | -28.34           | -35.79                                       |
| <b>I24+NO</b>              | 0                       | 0                | 0                | 0                           | 0                | 0                | 0                                            |
| <b>I25+NO<sub>2</sub></b>  | -11.57                  | -11.13           | -10.79           | -14.57                      | -14.14           | -13.66           | -11.58                                       |
| <b>I25</b>                 | 0                       | 0                | 0                | 0                           | 0                | 0                | 0                                            |
| <b>TS17</b>                | 4.33                    | 3.26             | 3.07             | 2.82                        | 2.20             | 2.11             | 3.12                                         |
| <b>I26+COF<sub>2</sub></b> | -9.09                   | -9.66            | -10.95           | -9.85                       | -10.10           | -14.99           | -10.83                                       |
| <b>I26+O<sub>2</sub></b>   | 0                       | 0                | 0                | 0                           | 0                | 0                | 0                                            |
| <b>I27</b>                 | -36.91                  | -36.11           | -34.32           | -33.92                      | -33.22           | -30.67           | -35.54                                       |
| <b>I27+NO</b>              | 0                       | 0                | 0                | 0                           | 0                | 0                | 0                                            |
| <b>I28+NO<sub>2</sub></b>  | -13.05                  | -13.30           | -12.95           | -16.53                      | -16.13           | -15.79           | -12.82                                       |
| <b>I28</b>                 | 0                       | 0                | 0                | 0                           | 0                | 0                | 0                                            |
| <b>TS18</b>                | 0.6                     | -0.4             | 0.2              | 1.17                        | -0.94            | 0.73             | 0.3                                          |

|                            |        |        |        |        |        |        |        |
|----------------------------|--------|--------|--------|--------|--------|--------|--------|
| <b>I29+COF<sub>2</sub></b> | -25.29 | -24.91 | -27.64 | -22.67 | -22.15 | -20.23 | -25.76 |
| <b>I29+O<sub>2</sub></b>   | 0      | 0      | 0      | 0      | 0      | 0      | 0      |
| <b>TS19</b>                | 5.15   | 4.21   | 7.67   | 4.65   | 4.01   | 5.74   | 4.55   |
| <b>P8+HO<sub>2</sub></b>   | -23.59 | -24.41 | -24.52 | -18.16 | -18.09 | -19.87 | -22.98 |
| <b>P8+OH</b>               | 0      | 0      | 0      | 0      | 0      | 0      | 0      |
| <b>TS20</b>                | 4.33   | 2.5    | 3.08   | 4.11   | 2.39   | 2.96   | 3.56   |
| <b>I30+H<sub>2</sub>O</b>  | -38.59 | -37.84 | -37.91 | -35.42 | -34.57 | -34.22 | -38.31 |
| <b>I30+O<sub>2</sub></b>   | 0      | 0      | 0      | 0      | 0      | 0      | 0      |
| <b>I31</b>                 | -23.16 | -20.77 | -17.61 | -22.28 | -19.45 | -17.99 | -22.67 |
| <b>I31+NO</b>              | 0      | 0      | 0      | 0      | 0      | 0      | 0      |
| <b>I32+NO<sub>2</sub></b>  | -11.20 | -10.89 | -9.91  | -14.60 | -14.66 | -14.18 | -12.58 |
| <b>I32</b>                 | 0      | 0      | 0      | 0      | 0      | 0      | 0      |
| <b>TS21</b>                | 5.23   | 4.11   | 2.79   | 2.26   | 1.44   | 7.29   | 5.04   |
| <b>I19+CO<sub>2</sub></b>  | -17.29 | -16.86 | -15.99 | -20.06 | -21.88 | -29.23 | -16.84 |
| <b>I19+O<sub>2</sub></b>   | 0      | 0      | 0      | 0      | 0      | 0      | 0      |
| <b>TS14</b>                | 3.51   | 2.38   | 4.47   | 1.69   | 1.26   | 5.6    | 3.11   |
| <b>CO+HO<sub>2</sub></b>   | -35.89 | -33.98 | -33.62 | -33.45 | -30.50 | -28.48 | -35.07 |

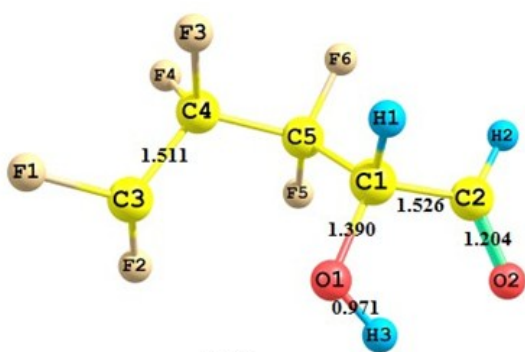

**I20**

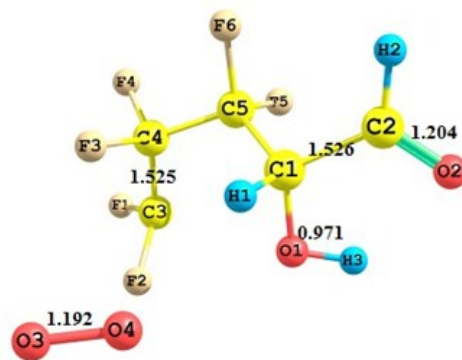

**I20+O<sub>2</sub>**

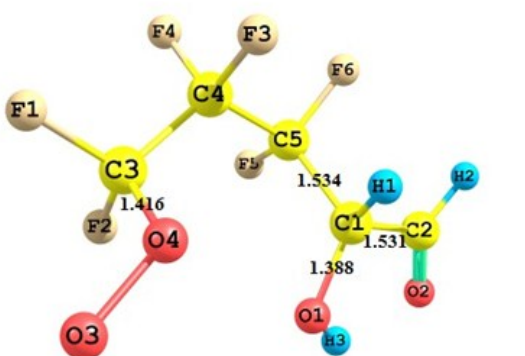

**I21**

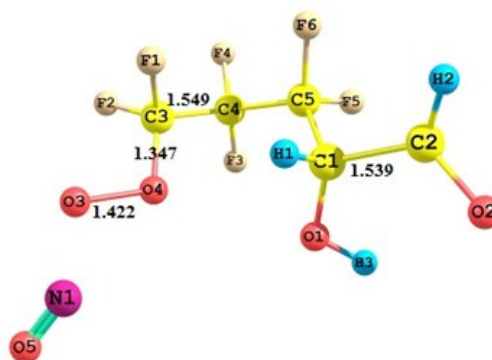

**I21+NO**

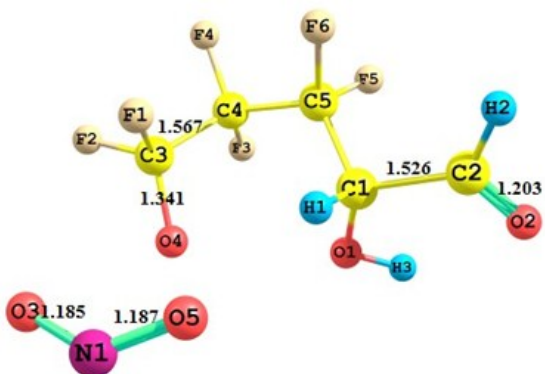

**I22+NO<sub>2</sub>**

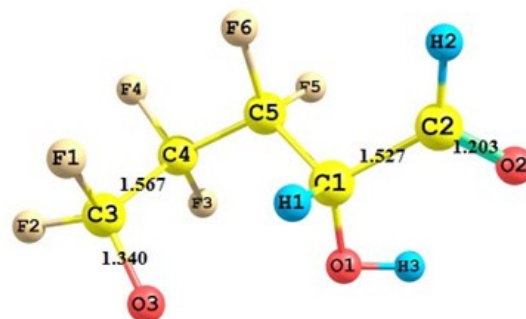

**I22**

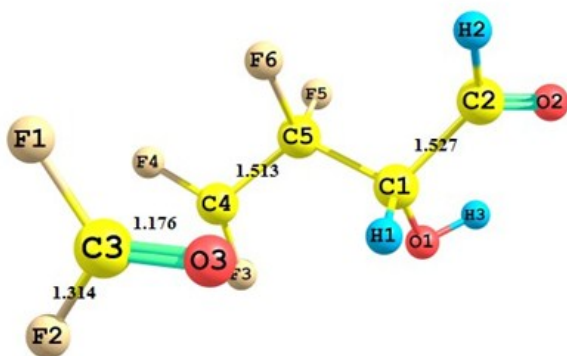

**I23+COF<sub>2</sub>**

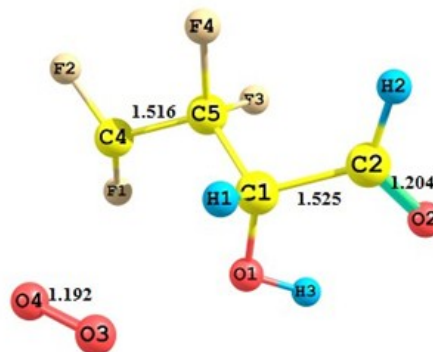

**I23+O<sub>2</sub>**

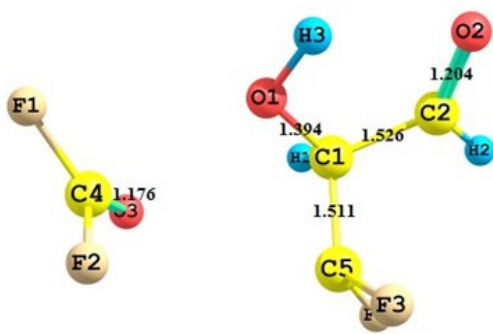

**I26+COF<sub>2</sub>**

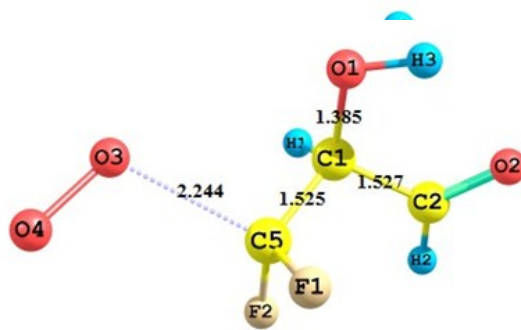

**I26+O<sub>2</sub>**

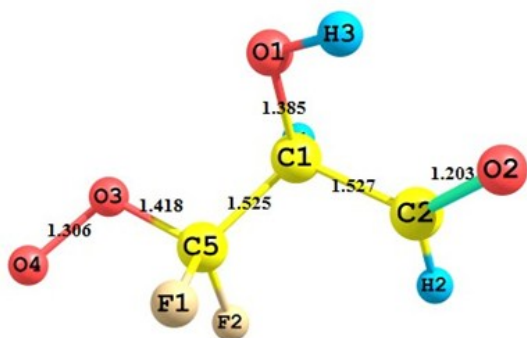

**I27  
I25+NO<sub>2</sub>**

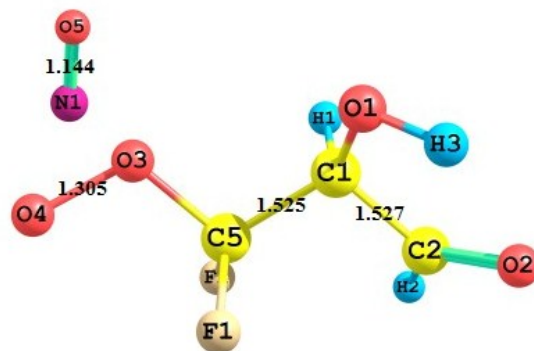

**I27+NO  
I25**

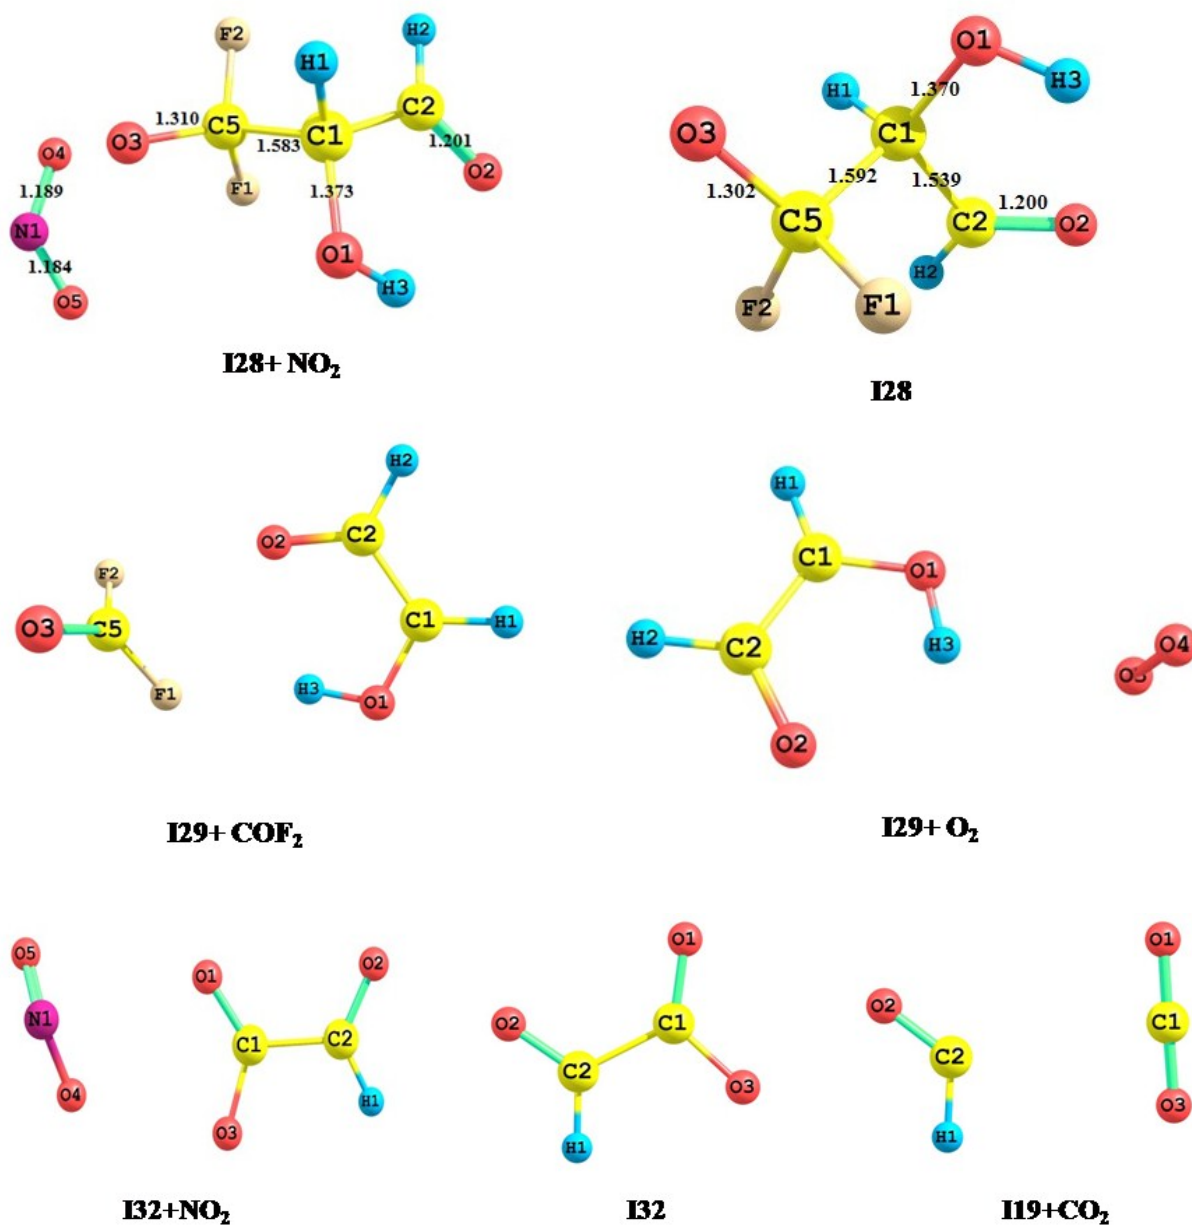

**Fig. S4:** Optimized structure of the intermediates and products involved in the second decomposition pathway of I4.
